# Supplementary material for: The novel ciliogenesis regulator DYRK2 governs Hedgehog signaling during mouse embryogenesis
Source: eLife. 2020 Aug 6;9:e57381. doi: 10.7554/eLife.57381 (PMC7410489; doi:10.7554/eLife.57381)
Supplement: Figure 2—figure supplement 1—source data 1. [file elife-57381-fig2-figsupp1-data1.xlsx]

## Sheet: Sheet1
	Figure 2—figure supplement 1B
	Gli1			Ptch1			Shh			Foxf2
	Wild	Dyrk2 -/-		Wild	Dyrk2 -/-		Wild	Dyrk2 -/-		Wild	Dyrk2 -/-
	0.95	0.81		1.08	0.79		0.92	0.89		0.89	0.47
	1.13	0.78		0.98	0.62		1.01	0.78		1.06	0.54
	0.92	0.89		0.94	0.78		1.07	0.97		1.05	0.48
