# Supplementary material for: The novel ciliogenesis regulator DYRK2 governs Hedgehog signaling during mouse embryogenesis
Source: eLife. 2020 Aug 6;9:e57381. doi: 10.7554/eLife.57381 (PMC7410489; doi:10.7554/eLife.57381)
Supplement: Figure 2—source data 1. [file elife-57381-fig2-data1.xlsx]

## Sheet: Sheet1
	Figure 2C
	Gli1			Ptch1			Shh
	Wild	Dyrk2 -/-		Wild	Dyrk2 -/-		Wild	Dyrk2 -/-
	0.93	0.78		1.05	0.74		0.99	1.02
	1.01	0.7		1	0.61		1.05	1.07
	1.05	0.62		0.95	0.42		0.95	1.18
	Figure 2E
	Foxf2
	Wild	Dyrk2 -/-
	0.737385	0.216958
	1.13327	0.286278
	1.12935	0.273666
