# Supplementary material for: The novel ciliogenesis regulator DYRK2 governs Hedgehog signaling during mouse embryogenesis
Source: eLife. 2020 Aug 6;9:e57381. doi: 10.7554/eLife.57381 (PMC7410489; doi:10.7554/eLife.57381)
Supplement: Figure 3—figure supplement 1—source data 1. [file elife-57381-fig3-figsupp1-data1.xlsx]

## Sheet: Sheet1
	Figure 3—figure supplement 1A
	Dyrk2				Gli1				Ptch1
	siCont.	siDyrk2 #1	siDyrk2 #2		siCont.	siDyrk2 #1	siDyrk2 #2		siCont.	siDyrk2 #1	siDyrk2 #2
	1	0.24	0.16		104.3	13.7	12		19.5	5.4	2.9
	1	0.32	0.15		69.1	24.3	16.7		21.6	5.7	4.7
	1	0.24	0.18		126.7	15.3	15		30.8	5.3	4.5
	1	0.27	0.21		93.4	24.1	34.4		34.8	9.8	8.9
	1	0.29	0.17		189.4	26.7	33.5		57.7	6.4	6.7
