# Supplementary material for: The novel ciliogenesis regulator DYRK2 governs Hedgehog signaling during mouse embryogenesis
Source: eLife. 2020 Aug 6;9:e57381. doi: 10.7554/eLife.57381 (PMC7410489; doi:10.7554/eLife.57381)
Supplement: Figure 3—figure supplement 2—source data 1. [file elife-57381-fig3-figsupp2-data1.xlsx]

## Sheet: Sheet1
	Figure 3—figure supplement 2B
	GLI3 FL
	Wild		Dyrk2 -/-
	non	SAG	non	SAG
	1	0.74	1.03	0.83
	1	0.74	0.94	0.84
	1	0.81	1.08	0.86
	Figure 3—figure supplement 2C
	GLI3 REP
	Wild		Dyrk2 -/-
	non	SAG	non	SAG
	1	0.29	1.09	0.72
	1	0.3	1.16	0.64
	1	0.19	1.04	0.56
	Figure 3—figure supplement 2D
	GLI3 REP/GLI3 FL
	Wild		Dyrk2 -/-
	non	SAG	non	SAG
	0.51	0.2	0.54	0.44
	0.63	0.25	0.77	0.48
	0.79	0.31	0.74	0.45
