# Supplementary material for: The novel ciliogenesis regulator DYRK2 governs Hedgehog signaling during mouse embryogenesis
Source: eLife. 2020 Aug 6;9:e57381. doi: 10.7554/eLife.57381 (PMC7410489; doi:10.7554/eLife.57381)
Supplement: Figure 3—source data 1. [file elife-57381-fig3-data1.xlsx]

## Sheet: Sheet1
	Figure 3A
	Gli1					Ptch1
	Wild		Dyrk2 -/-			Wild		Dyrk2 -/-
	non	SAG	non	SAG		non	SAG	non	SAG
	0.015	1.197	0.004	0.051		0.015	0.339	0.013	0.025
	0.017	1.553	0.004	0.036		0.014	0.362	0.01	0.021
	0.014	0.853	0.003	0.041		0.013	0.239	0.012	0.027
	0.023	2.042	0.003	0.032		0.016	0.688	0.008	0.021
	0.017	2.227	0.004	0.037		0.016	0.75	0.012	0.026
	Figure 3D
	Gli1					Ptch1
	empty	WT	K250R			empty	WT	K250R
	4.8	163	38			1.75	19.16	3.22
	4.7	215	41			1.73	19.9	3.68
	4.7	267	77			1.54	24.93	3.02
