# Supplementary material for: The novel ciliogenesis regulator DYRK2 governs Hedgehog signaling during mouse embryogenesis
Source: eLife. 2020 Aug 6;9:e57381. doi: 10.7554/eLife.57381 (PMC7410489; doi:10.7554/eLife.57381)
Supplement: Figure 3—source data 2. [file elife-57381-fig3-data2.xlsx]

## Sheet: Sheet1
	Figure 3F
	GLI2
	Wild		Dyrk2 -/-
	non	SAG	non	SAG
	1	2.51	1.53	1.23
	1	2.33	1.83	1.57
	1	1.36	0.91	0.76
	1	1.41	0.63	0.68
