# Supplementary material for: The novel ciliogenesis regulator DYRK2 governs Hedgehog signaling during mouse embryogenesis
Source: eLife. 2020 Aug 6;9:e57381. doi: 10.7554/eLife.57381 (PMC7410489; doi:10.7554/eLife.57381)
Supplement: Figure 4—figure supplement 1—source data 1. [file elife-57381-fig4-figsupp1-data1.xlsx]

## Sheet: Sheet1
	Figure 4—figure supplement 1B				Figure 4—figure supplement 1C
	cilia length (μm)				cilia length (μm)
	siCont.	siDyrk2 #1	siDyrk2 #2		siCont.	siDyrk2 #1	siDyrk2 #2
	2.654	4.102	5.423		2.37023	4.99264	5.60524
	3.24	4.138	3.2		2.5282	6.02428	4.60745
	1.657	4.607	7.063		1.82791	4.55882	3.84393
	3.42	5.788	5.852
	3.822	3.013	5.174
	4.103	6.341	10.346
	2.049	8.106	6.242
	2.075	1.797	8.553
	1.449	2.104	7.336
	1.449	10.544	8.148
	2.62	6.386	4.08
	2.72	5.458	5.98
	1.62	8.62	5.013
	1.62	2.592	10.048
	2.1	4.889	3.28
	1.66	7.512	3.958
	1.94	2.104	3.705
	2.31	6.684	4.741
	1.88	5.362	3.358
	2.702	7.124	5.863
	1.438	3.958	5.697
	1.657	3.071	8.169
	2.187	5.575	4.696
	2.654	1.944	5.155
	1.308	5.027	2.976
	1.449	6.358	3.568
	1.404	7.941	4.646
	1.525	5.655	6.198
	2.881	9.361	5.068
	1.696	1.308	5.703
	1.77	2.445	4.499
	4.272	4.847	3.929
	3.694	2.904	3.711
	2.187	4.052	9.2
	3.991	11.428	5.386
	2.049	3.979	2.964
	3.061	2.749	2.497
	2.573	1.404	4.039
	3.553	7.376	1.151
	3.585	1.77	3.458
	1.876	7.939	3.062
	2.702	6.709	4.801
	2.72	2.948	4.547
	1.833	1.657	5.553
	1.308	10.767	3.28
	1.618	2.556	4.603
	3.41	2.898	4.149
	2.813	11.706	4.406
	2.104	5.629	6.522
	2.889	7.019	3.942
	2.157	5.739	3.498
	1.258	3.54	5.44
	1.985	4.084	4.839
	3.434	3.705	5.338
	2.898	8.138	4.664
	2.503	6.244	5.528
	0.916	1.705	5.395
	1.8	8.809	4.841
	1.94	7.508	14.61
	1.88	8.708	1.797
	4.81	5.974	4.629
	3.942	9.646	3.092
	2.157	6.792	3.639
	2.096	2.445	3.255
	1.705	5.851	7.375
	2.194	8.92	3.154
	2.337	8.678	6.592
	3.235	3.18	5.193
	2.926	5.323	4.043
	1.137	4.796	10.451
	3.255	11.003	3.958
	2.503	5.677	3.972
	1.797	4.621	2.187
	3.185	3.888	3.705
	3.755	9.234	4.329
	5.058	4.211	4.317
	1.944	7.119	1.296
	1.876	4.935	3.991
	2.164	5.387	2.702
	1.77	9.264	5.392
	3.343	3.826	5.58
	2.009	5.589	4.856
	2.104	2.808	5.484
	3.883	9.706	3.531
	3.483	3.695	4.776
	2.252	4.582	1.536
	1.536	6.371	2.573
	1.151	3.092	6.493
	1.482	10.009	4.465
	0.741	4.114	8.432
	1.258	4.935	5.632
	3.255	5.502	4.759
	0.539	2.164	2.773
	3.061	3.75	5.478
	1.296	8.415	4.594
	1.482	8.502	5.53
	2.842	6.528	7.458
	1.296	5.193	2.964
	1.936	4.043	1.206
	1.078	10.451	5.585
	1.308	3.958	4.889
	2.573	3.972	4.019
	3.581	2.187	2.992
	3.255	3.705	6.869
	1.806	4.329	4.324
	1.525	4.317	2.696
	1.482	1.296	5.872
	1.977	3.991	5.11
	1.449	2.702	4.398
	1.449	5.392	7.454
	1.546	5.58	3.836
	1.296	4.856	3.808
	1.797	5.484	5.215
	1.404	3.531	2.573
	1.308	4.776	4.906
	3.055	1.536	3.88
	2.172	2.573	3.627
	2.995	6.493	8.539
	2.503	4.465	4.796
	1.806	8.432	6.156
	1.536	5.632	7.712
	0.899	4.759	3.434
	1.206	2.773	2.445
	1.992	5.478	4.728
	1.944	4.594	2.096
	2.343	5.53	4.582
	1.449	7.458	4.019
	1.936	2.964	3.872
	2.273	1.206
	3.635	5.585
	2.366	4.889
	1.657	4.019
	1.944	2.992
	0.916	6.869
	0.968	4.324
	1.705	2.696
	1.137	5.872
	1.944	5.11
	2.573	4.398
	2.223	7.454
	0.916	3.836
	1.137	3.808
		5.215
		2.573
		4.906
		3.88
		3.627
		8.539
		4.796
		6.156
		7.712
		3.434
		2.445
		4.728
		2.096
		4.582
		4.019
		3.872
