# Supplementary material for: The novel ciliogenesis regulator DYRK2 governs Hedgehog signaling during mouse embryogenesis
Source: eLife. 2020 Aug 6;9:e57381. doi: 10.7554/eLife.57381 (PMC7410489; doi:10.7554/eLife.57381)
Supplement: Figure 4—figure supplement 2—source data 1. [file elife-57381-fig4-figsupp2-data1.xlsx]

## Sheet: Sheet1
	Figure 4—figure supplement 2A				Figure 4—figure supplement 2C				Figure 4—figure supplement 2D
	DYRK2				cilia length (μm)				cilia length (μm)
	siCont.	siDYRK2 #1	siDYRK2 #2		siCont.	siDYRK2 #1	siDYRK2 #2		siCont.	siDYRK2 #1	siDYRK2 #2
	1	0.212	0.325		2.302	5.935	1.151		2.09819	3.32898	3.56742
	1	0.162	0.276		2.223	4.462	5.386		2.04488	3.56861	4.01559
	1	0.193	0.301		3.061	2.79	5.267		1.91465	3.5283	3.79098
					1.618	2.364	4.075
					3.701	2.337	2.319
					4.367	4.929	5.466
					2.592	5.335	1.296
					3.189	5.224	2.027
					2.798	1.206	5.267
					1.85	1.048	4.361
					4.207	0.719	2.79
					2.573	3.846	3.279
					1.977	5.151	1.271
					2.19	1.628	4.639
					3.304	5.045	3.457
					3.185	1.628	6.066
					2.72	0.968	4.469
					2.033	4.099	2.172
					1.151	3.077	4.329
					2.808	3.47	2.696
					1.876	3.43	4.824
					2.696	3.91	1.093
					1.296	4.84	2.898
					3.122	2.99	1.271
					1.876	1.44	1.911
					1.705	5.57	2.172
					2.049	2.74	1.536
					3.013	3.1	1.705
					1.833	4.1	5.362
					1.797	3.28	4.1
					1.806	2.44	4.796
					2.195	2.42	3.635
					0.916	2.79	3.055
					0.539	4.19	3.235
					0.57	4.14	3.185
					2.74	3.6	2.009
					2.27	3.24	1.911
					1.53	1.536	2.337
					2.93	1.206	3.929
					2.5	3.666	2.765
					0.36	4.971	2.744
					1.99	2.654	3.103
					2.95	5.481	5.109
					1.66	1.797	4.181
					4.13	3.954	3.18
					2.23	2.948	0.899
					1.09	4.718	4.458
					2.56	3.471	4.495
					2.95	3.163	1.536
					1.4	4.075	1.77
					2.42	4.721	3.24
					2.1	4.377	2.288
					0.4	1.048	2.337
					2.172	4.055	0.968
					2.523	2.555	1.078
					1.608	3.144	3.49
					1.048	4.668	5.712
					2.876	5.712	1.536
					2.714	5.087	1.618
					0.568	2.009	1.797
					1.911	1.151	3.182
					1.093	2.592	2.842
					2.194	2.738	8.952
					1.369	2.225	3.829
					1.608	4.349	2.009
					2.948	1.536	3.652
					1.048	2.876	7.967
					1.972	3.299	4.347
					2.364	5.419	3.992
					2.749	2.672	2.672
					1.705	3.753	3.314
					0.719	3.144	3.791
					1.078	1.536	2.194
					0.804	6.08	2.696
					0.804	2.4	6.923
					1.137	2.34	1.546
					0.804	2.72	4.796
					2.299	5.07	3.49
					2.975	5.4	5.236
					1.936	6.92	1.296
					2.207	5.13	2.411
					0.508	1.44	2.967
					1.546	5.16	4.075
					2.411	1.8	1.296
					1.705	3.14	2.768
					0.804	1.83	5.853
					3.24	3.14	3.958
					2.672	2.84	1.797
					1.308	2.57	7.167
					2.672	2.57	4.351
					0.648	0.97	3.758
					2.617	3.2	4.134
					2.418	2.411	5.332
					2.164	2.991	3.471
					1.151	1.206	2.327
					2.948	3.595	4.329
					1.438	5.537	4.367
					0.899	3.077	2.749
					2.702	1.618	1.449
					2.411	2.79	2.88
					2.164	1.608	2.51
					2.654	1.658	2.1
					1.404	2.157	5.29
					1.628	1.296	4.68
					2.445	2.964	4.45
					1.137	5.286	5.17
					1.977	1.271	1.77
					0.899	3.24	2.44
					2.702	3.453	4.84
					2.343	3.925	2.67
					2.096	1.618	1.45
					2.033	2.813	6.508
					2.445	1.618	5.61
					1.449	3.958	4.347
					2.049	4.019	4.272
					3.013	1.546	7.03
					2.364	2.398	2.823
					2.904	2.302	3.415
					3.872	4.603	3.092
					2.015	4.94	4.971
					2.096	2.252	2.009
					0.899	6.016	4.192
					2.966	3.077	3.942
					2.009	2.033	2.096
					2.009	6.665	3.304
					1.438	2.654	4.321
					5.251	2.842	2.738
					2.053	4.039	3.705
					1.618	2.157	5.897
					2.009	3.581	3.753
					2.702	1.258	1.833
					3.061	2.672	6.495
					2.926	3.946	4.856
					2.79	2.928	1.271
					2.288	3.693	5.005
					1.206	4.839	5.187
					2.273	3.926	5.419
					1.876	3.434	3.951
					1.936	4.497	3.974
					1.525	4.421	1.271
					1.618	4.718	4.272
					2.157	2.302	4.935
					3.343	2.842	1.618
					2.145	3.559	3.925
					1.137	3.49	6.034
					2.498	1.944	4.863
					2.445	2.745	2.009
					1.308	1.308	3.705
					2.337	3.846	3.061
					2.808	3.061	2.672
					1.048	5.323	4.844
					1.696	3.092	1.911
					2.542	4.138	5.028
					2.672	4.019	6.142
					2.52	3.946	5.115
					2.01	4.608	4.207
					2.1	2.887	3.071
					2.05	2.497	3.54
					2.1	3.666	6.395
					1.77	4.33	3.916
					3.89	2.953	3.071
					1.08	4.421	5.332
					0.9	5.12	2.796
					1.88	2.926	3.813
					1.8	4.187	4.663
					1.83	2.194	6.357
					2.654	3.49	2.302
					1.705	5.404	3.701
					2.654	2.842	3.215
					1.078	1.258	3.139
					3.255	2.813	1.797
					4.469	1.657	1.438
					2.573	3.595	4.287
					1.093	3.791	3.425
					1.779	5.615	4.745
					2.239	6.11	2.991
					1.271	3.568	4.839
					1.797	2.592	5.241
					1.206	5.24	3.666
					2.842	3.431	3.215
					2.288	3.991	3.595
					2.104	8.455	4.272
					2.411	3.391	3.834
					2.049	4.23	3.103
					1.137	2.542	4.796
					1.449	1.657	2.802
					1.546	1.271	1.911
					2.049	1.449	5.362
					0.899	3.95	1.482
					1.078	2.98	2.589
					1.151	2.44	4.424
					1.944	3.3	2.617
					1.657	3.14	2.672
					2.337	2.75	4.822
					2.411	4.8	3.581
					3.872	4.07	2.445
					2.223	2.57	5.58
					1.525	2.99	4.927
					2.351	3.61	4.039
					2.009	3.71	2.928
					1.449	2.7	3.215
					1.936	3.45	5.036
					2.337	2.3	2.744
					2.273	4.14	8.431
					2.418	2.74	5.235
					2.104	1.14	2.876
					4.196	4.2	4.417
					1.048	4.85	8.551
					1.985	3.63	3.314
					2.749	5.22	6.532
					2.157	3.78	6
					1.85	4.64	5.033
					1.77	3.45	5.629
					1.608	1.81	2.808
					2.273	2.79	4.945
					1.449	2.81	3.883
					0.899	6.65	5.449
					1.696	4.55	6.628
					1.77	2.36	3.65
					1.482	6.6	2.516
					2.226	2.34	3.215
					3.28	4.07	3.545
					2.79	4.05	4.663
					2.096	2.93	3.821
					1.078	7.7	5.175
					2.049	8.14	3.471
					1.271	3.18	3.635
					1.797	4.14	2.672
					2.964	2.34	4.687
					1.017	2.34	6.113
					1.657	3.94	2.926
					2.349	2.72	3.991
					1.657	3.67	1.657
					2.337	2.75	2.881
					0.804	5.39	5.898
					2.618	2.44	1.404
					1.77	4.72	5.407
					2.926	4.78	3.345
					2.672	1.94	5.226
					1.608	2.79	2.984
					1.449	3.69	5.006
					2.343	4.14	3.077
					0.719	5.68	3.299
					2.406	4.4	5.869
					2.096	3.79	5.24
					1.911	4.98	5.575
					2.842	4.53	3.268
					2.194	1.54	4.058
					1.85	4.1	3.434
					3.092	1.77	4.347
					1.546	2.187	5.242
					1.525	3.415	4.718
					2.009	1.546	6.137
					1.618	4.388	2.049
					2.672	3.055	3.103
					1.797	2.302	2.813
					2.842	2.808	4.321
					2.343	3.255	3.639
					2.808	2.975	2.418
					2.049	4.106	5.048
					1.482	3.071	6.688
					1.546	1.536	1.449
					1.078	3.358	5.036
					2.904	3.139	3.617
					1.944	1.048	2.337
					2.009	4.547	5.323
					2.398	4.019	6.493
					3.463	3.791	3.779
					1.449	3.366	2.343
					3.193	4.034	3.255
					2.343	2.842	4.908
					1.078	4.099	5.638
					2.172	4.723	3.666
					3.958	6.972	4.019
					1.296	3.785	1.258
					1.137	3.144	2.842
					2.904	3.991	6.443
					2.418	4.997	2.157
					2.096	2.157	3.942
					1.618	4.933	2.808
					1.608	2.516	2.944
					2.79	2.343	5.754
					1.85	2.187	2.168
					2.445	3.061	5.551
					2.654	0.916	1.657
					1.093	2.523	3.991
					2.904	2.898	3.508
					2.104	1.705	2.306
					0.741	4.991	3.821
					1.093	3.701	2.948
					1.797	3.471	3.88
					0.968	4.113	3.872
					1.151	2.049	2.791
					1.308	4.96	3.299
					3.581	3.925	2.79
					3.798	4.138	2.398
					2.194	3.705	3.613
					2.337	4.317	6.082
					2.904	2.79	2.049
					1.608	2.926	4.103
					2.187	1.308	3.314
					1.536	3.215	7.002
					2.398	3.055	2.164
					1.977	2.975	4.256
					2.049	3.2	1.705
					2.79	5.128	3.49
					1.806	4.439	5.575
					1.137	5.895	4.099
					1.525	2.445	3.255
					1.206	2.157	3.613
					2.009	4.718	1.546
					1.078	3.581	4.149
					1.806	4.853	3.457
					0.804	2.991	3.395
					2.364	3.204	3.2
					1.85	6.576	3.979
					2.808	5.225	3.559
					1.093	5.603	2.104
					1.308	1.985	3.314
					1.258	4.052	3.49
					1.206	2.975	2.199
					1.151	3.568	2.702
					2.573	2.049	5.395
					1.151	2.696	4.536
					1.705	2.696	4.627
					3.49	2.398	2.96
					1.296	1.696	2.17
					1.404	2.796	4.5
					2.172	6.246	4.35
					1.449	3.946	4.76
					2.104	4.547	3.97
					1.206	5.942	3.06
					1.705	2.033	3.94
					2.164	4.138	6.07
					1.137	4.321	3.93
					1.404	1.449	3.85
					1.705	3.925	2.67
					0.968	3.055	4.94
					2.654	3.24	2.3
					0.899	3.24	3.14
					1.85	2.364	2.049
					1.296	3.377	4.181
					1.438	2.411	4.222
					1.404	1.369	4.138
					3.18	3.314	4.134
					1.546	2.172	3.979
					1.404	2.172	8.384
					2.252	2.876	4.786
					2.302	3.24	3.257
					1.705	2.523	3.846
					0.916	4.406	6.267
					1.137	2.187	4.607
					3.255	1.449	3.688
					1.806	1.944	4.438
					2.573	2.617	4.075
					1.985	4.505	3.314
					1.482	3.343	4.551
					0.899	4.039	4.138
					3.061	1.936	2.252
					3.24	2.744	3.304
					2.926	3.055	2.497
					1.048	2.573	1.936
					2.516	3.531	5.691
					3.49	3.144	3.808
					1.806	6.355	2.337
					2.009	4.945	5.323
					2.672	4.508	5.868
					1.657	5.289	1.944
					2.187	1.404	3.05
					3.255	3.639	7.301
					2.252	1.944	2.881
					2.702	2.749	2.252
					2.398	6.882	3.838
					1.151	5.999	2.542
					1.404	4.493	3.299
					1.151	2.555	5.061
					1.449	6.042	3.188
					1.977	1.296	3.453
					1.369	4.745	4.607
					1.482	3.531	2.672
					1.296	1.296	3.235
					3.109	4.103	2.049
					1.482	1.936	4.317
					1.797	4.687	5.311
					1.525	1.705	6.423
					1.779	5.405	5.225
					1.628	3.639	4.446
					1.449	2.738	6.679
					1.977	5.392	2.252
					1.536	1.876	4.276
					1.657	2.273	3.705
					4.526	2.096	3.092
					2.223	3.202	5.007
					2.503	4.421	5.045
					2.164	4.019	2.696
					2.302	7.334	3.453
					3.635	3.531	3.617
					2.009	1.618	3.353
					2.364	1.85	5.286
					1.258	5.308	2.898
					1.806	4.099	3.779
					2.523	5.307	3.701
					1.696	2.904
					2.445	4.704
					2.104	3.071
					1.657	3.639
					2.337	4.377
					0.899	1.944
					1.85	1.608
					1.536	4.388
					2.523	3.65
					1.628	4.776
					1.797	4.321
					1.696	1.85
					1.85	2.049
					1.936	4.508
					1.806	4.103
					1.048	3.144
					2.337	2.738
					2.672	4.134
					2.516	3.144
					1.936	3.54
					0.899	2.948
					2.009	2.194
					1.271	5.147
					2.738	5.777
					2.964	1.628
					2.164	3.813
					1.977	3.24
					1.696	3.705
					1.438	3.185
						3.103
						2.411
						3.471
						4.687
						4.039
						3.18
						5.262
						3.077
						6.636
						4.329
						5.395
						2.302
						2.033
						5.468
						3.595
						3.779
						2.364
						7.081
						5.395
						5.754
						4.196
						2.696
						2.975
