# Supplementary material for: The novel ciliogenesis regulator DYRK2 governs Hedgehog signaling during mouse embryogenesis
Source: eLife. 2020 Aug 6;9:e57381. doi: 10.7554/eLife.57381 (PMC7410489; doi:10.7554/eLife.57381)
Supplement: Figure 4—figure supplement 3—source data 1. [file elife-57381-fig4-figsupp3-data1.xlsx]

## Sheet: Sheet1
	Figure 4—figure supplement 3B
	ciliated (%)
	Wild	Dyrk2 -/-
	51.2	55.8
	52.7	51
	55.9	52.1
