# Supplementary material for: The novel ciliogenesis regulator DYRK2 governs Hedgehog signaling during mouse embryogenesis
Source: eLife. 2020 Aug 6;9:e57381. doi: 10.7554/eLife.57381 (PMC7410489; doi:10.7554/eLife.57381)
Supplement: Figure 4—source data 1. [file elife-57381-fig4-data1.xlsx]

## Sheet: Sheet1
	Figure 4B			Figure 4C
	cilia length (μm)			cilia length (μm)
	Wild	Dyrk2 -/-		Wild	Dyrk2 -/-
	2.533	4.823		1.52	3.53
	2.129	4.682		1.63	3.63
	1.977	3.462		1.82	3.67
	1.506	1.569		1.57	3.46
	0.971	3.219		1.78	3.72
	1.087	9.578
	0.564	3.848
	1.105	1.121
	1.632	3.144
	1.163	6.675
	0.818	2.646
	1.426	3.519
	1.26	4.178
	2.544	3.643
	1.357	5.467
	1.441	4.657
	1.441	5.83
	0.911	1.688
	1.285	3.362
	1.928	2.413
	1.782	4.835
	2.113	3.433
	1.19	2.586
	0.699	3.842
	1.901	2.771
	2.075	4.53
	1.001	4.32
	1.942	1.528
	1.595	4.835
	1.001	5.197
	2.907	1.111
	0.919	2.856
	0.951	2.241
	1.25	3.199
	2.606	2.765
	0.853	4.371
	3.288	1.684
	1.736	3.786
	0.644	3.506
	1.657	4.169
	1.999	2.54
	0.884	3.562
	0.663	6.197
	1.039	3.48
	1.018	3.145
	2.097	1.862
	2.814	5.996
	1.337	1.411
	1.172	7.222
	1.563	1.246
	1.546	4.064
	1.244	2.818
	1.146	3.183
	2.388	3.486
	2.635	3.39
	1.289	4.379
	0.988	1.335
	2.285	3.518
	0.874	3.46
	0.977	3.469
	2.239	4.323
	0.961	2.786
	0.996	1.731
	2.386	1.285
	1.63	4.384
	1.792	3.416
	0.713	3.471
	1.058	5.103
	0.633	3.058
	1.127	2.227
	2.534	3.32
	0.781	3.988
	3.155	2.257
	1.486	0.938
	1.563	2.143
	1.149	2.077
	0.786	3.416
	1.441	3.761
	1.412	1.061
	1.994	2.857
	2.272	2.971
	1.299	2.293
	1.188	8.318
	0.996	3.803
	1.063	3.191
	2.814	4.133
	1.095	2.795
	1.68	4.51
	1.567	2.633
	1.147	5.502
	1.048	3.122
	1.417	2.665
	1.519	4.667
	1.403	7.218
	1.328	3.786
	1.743	3.448
	3.137	3.843
	0.786	1.606
	1.756	3.267
	2.184	7.878
	1.563	0.945
	2.333	3.486
	2.309	2.612
	2.003	4.201
	2.11	3.395
	2.421	3.491
	2.645	4.068
	1.631	2.017
	3.058	0.893
	2.328	4.073
	1.527	6.441
	0.703	1.961
	1.89	3.444
	1.804	6.98
	2.299	3.796
	2.204	2.011
	1.72	7.165
	1.46	4.342
	1.186	6.795
	0.896	2.21
	1.575	1.642
	2.516	3.62
	1.556	2.163
	1.331	3.587
	2.818	4.722
	1.214	0.938
	2.792	1.266
	1.29	2.134
	1.611	6.654
	1.188	3.633
	1.311	4.684
	1.422	2.344
	1.368	2.54
	1.801	2.46
	0.747	5.245
	1.496	4.938
	1.981	2.592
	1.299	2.971
	1.793	4.02
	1.052	4.001
	1.26	2.657
	1.625	6.069
	2.027	2.607
	1.503	2.82
	1.236	4.412
	1.26	4.095
	0.996	3.814
	1.368	2.571
	0.941	3.713
	0.996	1.433
	1.166	3.347
	1.66	6.584
	1.773	2.814
	1.067	4.633
	2.027	8.052
	2.313	4.183
	1.43	4.885
	1.88	7.28
	1.37	2.917
	1.77	1.322
	1.99	3.504
	1.69	3.414
	1.963	3.099
	2.674	5.17
	1.556	1.105
	2.293	2.67
	1.611	2.877
	1.048	3.106
	1.494	2.846
	1.409	4.575
	1.508	2.598
	1.556	2.474
	1.611	1.311
	2.233	4.274
	1.433	1.582
	2.098	5.626
	1.793	3.99
	2.889	5.385
	1.818	2.4
	1.313	2.613
	2.757	1.359
	2.718	4.132
	1.632	3.819
	1.768	2.714
	1.539	7.092
	2.566	1.485
	0.895	5.768
	2.308	2.22
	2.011	2.77
	1.166	1.93
	2.57	5.22
	1.023	4.55
	2.448	2.69
	1.996	2.63
	1.767	3.6
	1.526	2.13
	1.563	1.54
	1.136	7.47
	2.276	2.8
	3.462	4.9
	2.533	3.6
	1.105	4.49
	2.792	4.82
	0.977	3.08
	1.381	6.42
	1.409	4.01
	0.996	4.26
	2.867	3.8
	1.251	3.51
	3.171	1.93
	1.081	2.91
	0.63	2.91
	0.945	2.01
	2.448	2.57
	2.272	8.8
	1.251	7.54
	2.699	3.11
	0.806	1.08
	0.977	2.43
	1.433	4.54
	0.861	7.86
	1.87	3.38
	0.78	3.92
	2.38	3.42
	1.1	2.52
	1.66	3.8
	1.42	3.29
	0.7	3.18
	2.1	3.59
	1.46	4.84
	0.58	2.68
	0.671	1.69
	1.691	4.15
	1.048	3.54
	1.426	7.89
	1.758	3.47
	1.831	1.66
	5.035	1.03
	3.608	1.89
	1.326	1.97
	1.441	2.14
	1.415	3.7
	1.313	3.65
	1.63	3.68
	1.535	4.79
	0.974	2.77
	1.501	1.75
	0.564	6.95
	0.895	4.61
	2.308	2.34
	1.731	4.17
	2.14	7.76
	1.3	3.87
	1.065	2.33
	1.547	5.54
	2.075	2.52
	0.988	4.18
	1.244	2.39
	2.251	3.48
	1.621	2.71
	1.528	1.66
	1.105	3.74
	1.433	9.51
	1.488	2.48
	1.29	2.81
	1.334	2.26
	1.734	3.117
	1.223	4.945
	2.609	3.362
	1.172	4.073
	1.299	1.658
	1.528	3.18
	1.924	7.077
	1.299	2.356
	2.763	1.563
	1.669	2.933
	0.941	3.283
	1.681	3.327
	1.329	4.561
	2.04	2.307
	1.334	4.448
	2.011	5.49
	1.226	2.976
	1.992	2.41
	1.299	3.923
	2.128	1.457
	1.299	2.299
	0.977	9.284
	2.04	2.823
	1.611	5.756
	1.019	2.728
	1.409	2.376
	1.313	3.619
	1.741	4.974
	1.411	5.286
	1.426	2.101
	2.421	3.41
	2.003	2.623
	2.229	2.607
	1.069	2.473
	0.896	2.685
	1.033	6.008
	1.048	3.817
	1.681	3.446
	1.597	2.671
	1.707	1.188
	1.855	1.851
	0.967	3.156
	1.691	5.484
	1.115	3.74
	1.834	2.621
	3.145	4.546
	1.105	3.289
	1.582	3.283
	1.818	3.491
	1.954	4.457
	2.233	3.564
	2.097	4.412
	0.861	1.188
	2.268	1.514
	3.277	2.191
	1.694	2.056
	1.72	4.868
	1.876	1.365
	1.506	3.478
	1.039	2.857
	1.239	2.558
	2.021	5.522
	1.129	2.449
	0.743	2.032
	2.251	4.076
	1.469	1.707
	2.277	3.25
	1.547	3.291
	1.319	6.915
	1.876	3.058
	1.933	1.403
	0.967	5.623
	2.913	6.283
	1.81	5.053
	2.212	2.782
	1.691	2.762
	1.28	1.842
	1.399	3.985
	1.314	1.864
	1.785	1.172
	1.512	6.879
	2.017	2.311
	2.377	2.128
	1.606	2.621
	2.46	6.852
	2.818	4.071
	2.104	2.697
	2.066	5.171
	2.459	3.696
	1.19	2.391
	2.078	3.992
	1.415	2.954
	2.323	2.538
	1.888	1.707
	2.177	8.031
	1.689	2.72
	1.877	1.426
	2.579	2.224
	1.454	3.656
	1.576	4.442
	1.829	2.608
	1.198	4.451
	2.289	3.105
	0.957	4.089
	2.414	3.128
	1.573	5.19
	1.971	8.893
	1.45	3.096
		3.723
		6.101
		1.548
		2.749
		4.67
		2.457
		2.768
		1.48
		2.078
		2.61
		3.633
		6.669
		2.856
		2.713
		5.706
		4.838
		4.049
		4.76
		4.664
		2.21
		5.002
		1.235
		2.151
		3.262
		4.624
		4.488
		3.733
		5.939
		4.822
		3.543
		3.351
		3.834
		6.083
		4.317
		2.757
		4.126
		2.185
		3.264
		4.852
		3.105
