# Supplementary material for: The novel ciliogenesis regulator DYRK2 governs Hedgehog signaling during mouse embryogenesis
Source: eLife. 2020 Aug 6;9:e57381. doi: 10.7554/eLife.57381 (PMC7410489; doi:10.7554/eLife.57381)
Supplement: Figure 6—figure supplement 3—source data 1. [file elife-57381-fig6-figsupp3-data1.xlsx]

## Sheet: Sheet1
	Figure 6—figure supplement 3C					Figure 6—figure supplement 3D
	cilia length (μm)					cilia length (μm)
	Wild		Dyrk2 -/-			Wild		Dyrk2 -/-
	Vehicle	Rapamycin	Vehicle	Rapamycin		Vehicle	Rapamycin	Vehicle	Rapamycin
	2.01	1.96	3.73	3.96		2.34	1.78	2.16	2.16
	1.91	1.82	4.02	3.92		2.17	1.66	3.34	2.01
	1.97	2.07	4	3.96		1.7	1.44	8.85	2.05
						2.1	2.34	5.18	3.98
						2.16	2.34	3.65	5.63
						1.77	1.71	1.44	3.34
						2.29	1.85	3.43	1.45
						1.21	2.34	5.15	2.44
						1.71	2.57	2.74	8.34
						2.74	2.01	2.44	3.14
						1.3	3.09	3.47	7.56
						2.22	1.48	4.39	5.41
						2.17	1.21	3.46	4.35
						2.22	1.63	1.61	1.66
						1.27	1.37	4.58	3.59
						1.71	2.98	4.5	3.34
						1.77	1.7	2.41	1.45
						1.26	1.54	3.59	4.51
						2.16	1.94	7.54	7.46
						1.98	1.27	3.81	2.5
						2.79	1.37	1.81	7.71
						2.27	1.66	4.64	3.31
						1.48	2.34	5.62	3.54
						2.41	1.99	4.49	3.24
						2.25	1.21	5.82	6.23
						1.55	0.74	4.99	1.94
						2.34	1.88	4.84	5.19
						2.16	2.19	6.83	2.19
						1.27	2.65	2.88	5.5
						1.88	2.59	1.45	2.74
						1.31	2.34	1.94	3.43
						1.55	1.81	1.91	5.15
						1.99	1.53	5.32	5.63
						1.99	3.74	2.01	4.46
						2.16	1.66	4.06	2.88
						1.45	2.25	3.46	4.72
						2.29	2.55	2.01	2.17
						2.22	2.52	4.71	4.7
						2.1	2.01	3.89	5.07
						2.55	1.83	5.68	5.07
						1.85	1.66	2.16	2.88
						1.81		4.64	4.11
						2.34		3.95	3.97
						2.05		4.53	3.14
						2.01		6.14	3.14
						1.55		3.39	4.26
						2.42		3.53	6.26
								4.54	2.1
								1.05	2.29
								4.66
								2.34
								2.41
								3.24
								7.81
								6.27
								2.81
								4.95
								3.71
