# Supplementary material for: The novel ciliogenesis regulator DYRK2 governs Hedgehog signaling during mouse embryogenesis
Source: eLife. 2020 Aug 6;9:e57381. doi: 10.7554/eLife.57381 (PMC7410489; doi:10.7554/eLife.57381)
Supplement: Figure 6—source data 1. [file elife-57381-fig6-data1.xlsx]

## Sheet: Sheet1
	Figure 6B					Figure 6D					Figure 6F
	SMO (%)					GLI2 (%)					GLI3 (%)
	Wild		Dyrk2 -/-			Wild		Dyrk2 -/-			Wild		Dyrk2 -/-
	non	SAG	non	SAG		non	SAG	non	SAG		non	SAG	non	SAG
	0	89.5	0	96.1		12.5	81.8	77.4	97.6		25.8	67.4	100	95.3
	0	87.7	4	94.8		6.8	83.1	77.3	100		15.8	65.7	95	98.3
	2.7	95.7	0	90.9		10	77.5	72.9	100		9.3	63.5	92.5	100
