# Supplementary material for: The novel ciliogenesis regulator DYRK2 governs Hedgehog signaling during mouse embryogenesis
Source: eLife. 2020 Aug 6;9:e57381. doi: 10.7554/eLife.57381 (PMC7410489; doi:10.7554/eLife.57381)
Supplement: Figure 7—source data 1. [file elife-57381-fig7-data1.xlsx]

## Sheet: Sheet1
	Figure 7B
	Aurka			Plk1			Ube2c			Tpx2			Kif2c			Cdc20
	Wild	Dyrk2 -/-		Wild	Dyrk2 -/-		Wild	Dyrk2 -/-		Wild	Dyrk2 -/-		Wild	Dyrk2 -/-		Wild	Dyrk2 -/-
	1	0.42		0.99	0.37		1.05	0.43		1.05	0.46		0.96	0.38		1.13	0.27
	1.26	0.64		1.29	0.6		1.25	0.59		1.25	0.63		1.31	0.51		1.23	0.49
	0.74	0.54		0.72	0.47		0.7	0.57		0.7	0.58		0.72	0.53		0.64	0.47
