# Supplementary material for: The novel ciliogenesis regulator DYRK2 governs Hedgehog signaling during mouse embryogenesis
Source: eLife. 2020 Aug 6;9:e57381. doi: 10.7554/eLife.57381 (PMC7410489; doi:10.7554/eLife.57381)
Supplement: Figure 8—source data 1. [file elife-57381-fig8-data1.xlsx]

## Sheet: Sheet1
	Figure 8B				Figure 8D				Figure 8E
	Aurka				cilia length (μm)				cilia length (μm)
	siNeg.	siAurka #1	siAurka #2		siNeg.	siAurka #1	siAurka #2		siNeg.	siAurka #1	siAurka #2
	1	0.11	0.403		1.98	2.84	6.95		2.04583	3.61721	3.35059
	1	0.124	0.32		1.66	2.16	2.27		2.14463	3.93242	3.31318
	1	0.132	0.289		2.19	3.27	2.7		2.18905	3.70581	4.09312
					2.19	2.34	2.74		1.97143	3.64333	3.70306
					1.66	2.22	3.64
					2.3	3.81	1.45
					1.71	3.99	3.58
					1.66	3.47	3.71
					2.81	2.54	2.93
					1.88	5.05	2.57
					2.44	4.61	2.72
					1.66	5.49	1.62
					1.09	3.54	3.7
					1.88	3.08	2.22
					1.8	4.07	4.06
					3.07	3.24	4.27
					1.7	1.37	2.9
					1.85	5.43	2.54
					3.87	1.94	2.36
					1.78	3.95	2.7
					1.85	3.14	3.45
					1.8	2.98	3.24
					1.85	4.1	3.62
					2.05	2.74	4.35
					2.29	5.88	3.2
					2.1	4.49	3.22
					3.05	2.34	4.14
					2.54	3.55	2.82
					3.28	4.57	5.66
					1.09	2.75	3.14
					2.01	4.04	5.18
					2.01	2.1	3.18
					2.44	5.21	2.52
					1.61	4	3.59
					1.05	2.62	2.83
					1.45	3.34	3.47
					2.01	4.46	3.34
					1.83	4.78	1.77
					1.94	5.81	2.99
					2.4	2.16	5.7
					1.15	5.87	2.65
					1.77	4.83	2.05
					1.45	1.37	5.26
					3.14	2.79	2.5
					2.34	4.11	4.69
					2.1	4.1	4.54
					1.66	3.31	2.72
					2.03	3.06	3.54
					2.4	4.6	2.57
					1.83	3.3	6.05
					1.8	3.62	1.27
					2.16	3.86	2.98
					1.99	3.75	4.1
					2.7	3.41	2.36
					0.9	1.37	2.05
					2.29	5.49	2.65
					1.54	4.78	4.27
					1.3	3.2	2.34
					1.45	5.38	3.67
					1.98	2.16	2.84
					1.88	3.84	3.28
					1.77	4.7	2.17
					2.67	5.12	3.28
					2.88	3.14	3.18
					2.1	3.85	2.93
					2.1	3.79	4.69
					2.79	5.25	4.29
					1.21	6.01	3.68
					3.58	3.14	3.28
					0.9	2.05	2.19
					1.94	4.84	3.81
					3.63	3.71	2.96
					1.55	6.04	3.47
					2.57	3.96	2.34
					2.44	5.06	2.74
					3.81	2.98	4.95
					3.95	5.24	2.95
					2.75	4.01	3.3
					2.05	2.4	4.7
					2.16	2.4	3.31
					2.16	6.28	4.2
					2.84	6.31	2.4
					1.8	2.22	2.74
					1.48	3.18	4.37
					2.7	2.34	3.81
					2.27	4.11	4.18
					3.18	6.27	2.74
					2.22	2.3	3.62
					1.99	2.16	3.58
					1.45	3.3	3.45
					2.29	3.31	1.94
					2.17	3.1	3.24
					1.98	3.06	4.04
					1.7	2.62	3.64
					1.85	4.99	3.07
					1.94	2.22	6.59
					2.95	4.2	4.44
					1.3	3.45	2.19
					1.81	5.05	3.24
					1.27	2.65	4.11
					2.9	5.95	5.64
					2.57	3.1	4.53
					1.61	3.46	2.34
					1.55	2.41	3.07
					2.44	3.71	3.3
					2.62	4.24	5.55
					2.81	2.93	3.49
					1.45	3.3	8.23
					3.06	6.28	6.36
					1.21	2.05	2.44
					1.88	6.42	1.54
					3.09	5.36	2.57
					2.34	2.57	1.66
					1.88	3.59	2.16
					1.94	3.53	4.15
					2.74	3.14	6.27
					2.01	2.41	2.81
					2.72	4.6	2.9
					2.81	3.13	5.64
					2.86	5.23	3.41
					1.45	2.84	3.88
					0.9	2.5	7.09
					3.01	6.15	2.34
					1.8	1.83	5.18
					1.14	1.94	6.77
					1.71	3.88	5.04
					1.98	6.35	2.05
					3.41	3.09	5.45
					1.88	3.81	2.41
					2.65	1.3	2.71
					1.7	5.9	1.55
					1.21	2.84	5.71
					1.55	2.1	3.24
					1.66	5.27	2.65
					2.01	2.44	5.46
					1.7	2.55	5.55
					1.77	3.07	4.5
					2.01	3.58	4.13
					2.03	5.33	1.63
					1.61	2.9	1.8
					2.29	4.02	1.81
					2.27	3.09	4.94
					2.19	5.06	2.55
					1.53	3.94	5.09
					3.42	3.62	5.42
					2.05	3.26	2.03
					1.66	2.25	6.27
					3.64	4.89	3.18
					2.17	3	2.19
					1.15	5.29	5.05
					2.07	4.49	1.98
					2.01	3.57	5.4
					1.77	3.06	2.34
					0.74	2.4	3.47
						4.32	3.22
							3.09
							4.23
							4.55
							4.29
							4.7
							4.49
							3.3
							2.93
