# Supplementary material for: The novel ciliogenesis regulator DYRK2 governs Hedgehog signaling during mouse embryogenesis
Source: eLife. 2020 Aug 6;9:e57381. doi: 10.7554/eLife.57381 (PMC7410489; doi:10.7554/eLife.57381)
Supplement: Figure 9—source data 1. [file elife-57381-fig9-data1.xlsx]

## Sheet: Sheet1
	Figure 9F			Figure 9G
	cilia length (μm)			cilia length (μm)
	EGFP-positive cells	AURKA-EGFP-positive cells		EGFP-positive cells	AURKA-EGFP-positive cells
	2.33	2.16		3.24	1.36
	6.57	1.82		3.03	1.28
	1.85	1		3.06	1.14
	2.49	0.9
	5.28	1.09
	3.82	1.45
	1.48	1.35
	2.16	2.14
	3.9	0.9
	2.99	1.34
	3.78	1.58
	2.7	1.62
	4.1	1.57
	3.81	1.66
	3.21	1.34
	2.16	1.37
	2.81	1.61
	2.44	1.9
	1.7	1.5
	3.99	3.39
	2.85	1.42
	2.94	1.22
	2.01	1.15
	3.33	1
	4.95	1.04
	3.24	1.46
	3.84	0.57
	3.5	0.79
	2.81	0.57
	3.01	1.06
	1.79	1
	3.6	0.57
	2.19	1.46
	6.69	0.81
	3.06	1.14
	3.24	1.08
	2.34	1.44
	1.7	1.36
	2.81	1
	4.4	1.78
	7.08	0.97
	2.67	2.21
	2.43	1.14
	1.27	1.88
	1.83	1.76
	3.41	0.86
	1.15	1.53
	3.18	2.07
	3.41	0.89
	3.34	0.76
	2.62	1.61
	2.04	2.03
	2.54	0.73
	1.37	0.6
	4.02	1.2
	2.88	1.11
	3.17	1.36
	1.96	0.54
	3.07	1.54
	5.49	0.78
	2.43	1.27
	2.9	1.43
	2.36	1.84
	3.79	0.78
	1.4	0.76
	4.32	0.88
	3.99	0.86
	3.78	1.31
	3.45	1.51
	5.45	1.14
	2.81	1.5
	4.28	0.73
	1.78	0.66
	2.52	0.92
	3.17	0.56
	2.57	0.79
	2.66	0.78
	4.16	1.76
	3.15	2.26
	5.12	0.92
	2.42	2.32
	2.9	0.61
	2.28	0.94
	2.6	2.07
	2.57	0.61
	3.39	1.97
	3.87	0.51
	2.4	1.71
	2.34	0.63
	4.1	0.81
	2.41	1.44
	2.84	0.75
	4.59
	4.13
	3.01
	3.62
	2.59
	3.01
	2.4
	3.68
	1.24
	3.11
	2.85
	2.27
	2.67
	2.54
	3.69
	3
	4.2
	3.08
	1.15
	2.01
	3.54
	4.52
	2.07
	3.08
	4.33
	3.02
